# Supplementary material for: High sensitivity piezomagnetic force microscopy for quantitative probing of magnetic materials at the nanoscale
Source: Royal Society of Chemistry journal article supplement (doi:10.1039/c3nr00770g), 2013-01-01
Supplement: c3nr00770g.pdf [file c3nr00770g.pdf]

# High Sensitivity Piezomagnetic Force Microscopy for Quantitative Probing of Magnetic Materials at the Nanoscale

Qian Nataly Chen <sup>1,\*</sup>, Feiyue Ma <sup>1,\*</sup>, Shuhong Xie <sup>2</sup>, Yuanming Liu <sup>1</sup>, Roger Proksch <sup>3</sup>, and Jiangyu Li <sup>1,†</sup>

1. Department of Mechanical Engineering, University of Washington, Seattle, WA 98195-2600, USA
2. Faculty of Materials, Optoelectronics and Physics, and Key Laboratory of Low Dimensional Materials & Application Technology of Ministry of Education, Xiangtan University, Xiangtan, Hunan 411105, China
3. Asylum Research, 6310 Hollister Ave., Santa Barbara, CA 93117, USA

## Supporting Information

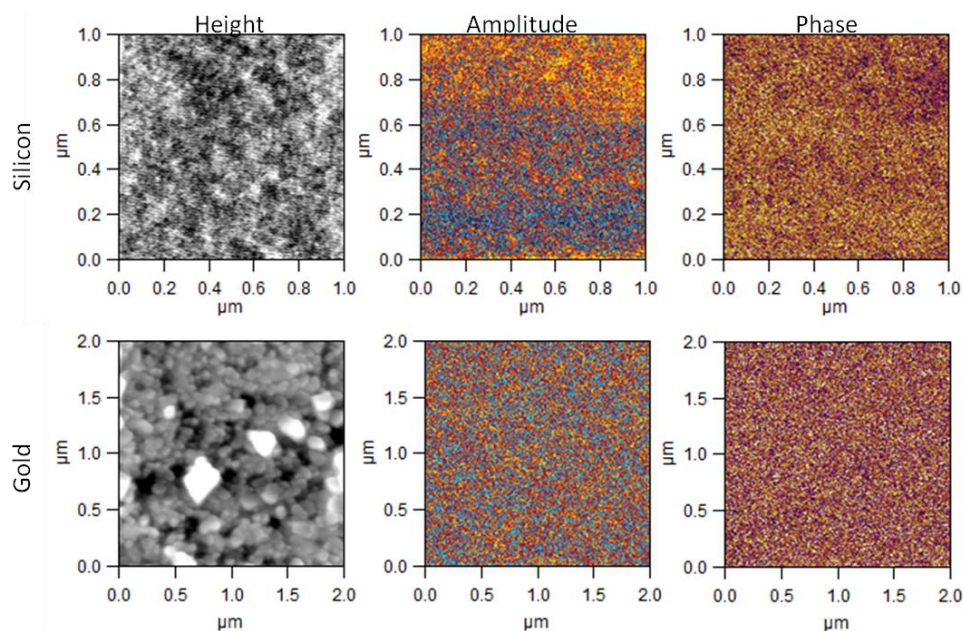

**Fig. S1** PmFM probing of silicon and gold-coated silicon, showing featureless mappings.

\* These authors contributed equally to the work.

† Author to whom the correspondence should be addressed to.

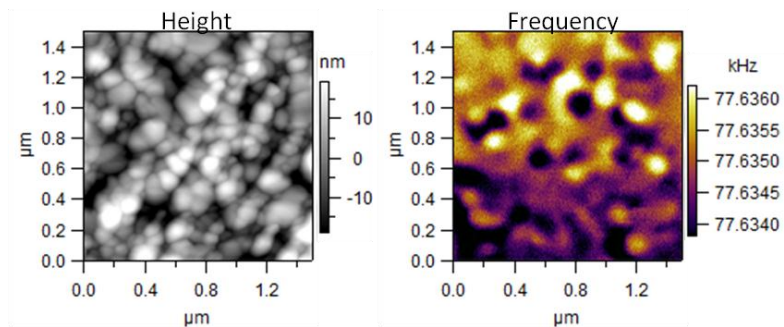

**Fig. S2** MFM of CFO film, showing limited contrast and spatial resolution.
